# Supplementary material
Source: Springer Nature journal article supplement (https://www.springermedizin.de/resource/supplementary/12888_2011_835_MOESM1_ESM.pdf/9478942)
Supplement: MOESM1 [file 9478942]

Potentially eligible studies identified  
after the initial data base search  
(n=567)

Abstract and title assess for  
eligibility

Full-text articles assess  
for eligibility

*Studies excluded* (n=556)

- Paper that analyze psychological consequences different from MDD
- Other kinds of disasters or chronic exposure to trauma
- Specific populations (emergency personnel, immigrants) or children or adolescent populations
- Assessment of depression not based on diagnostic criteria

*Studies included:*

Studies identified from search (n=11):

- Studies with victims population (n=6)
- Studies with general population samples (n=4)
- Studies with victims and general population samples (n=1)
- Cross sectional studies (n=9)
- Cohort studies (n=2)
